# Supplementary material for: Simultaneous conversion of all cell wall components by an oleaginous fungus without chemi-physical pretreatment
Source: Royal Society of Chemistry journal article supplement (doi:10.1039/c4gc01529k), 2014-12-01
Supplement: c4gc01529k1.pdf [file c4gc01529k1.pdf]

1 **Supplementary data**

2 **Table S1.** Chemical composition of sorghum stover.

3 **Table S2.**  $^{13}\text{C}$  chemical shift assignments in solid state CP-MAS analysis.

4 **Figure S1.** Released reducing sugar of untreated wild-type (WT), *bmr6* mutant (b6), *bmr12*  
5 mutant (b12) and *bmr6/bmr12* double mutant (b6b12) sorghum stover after 48h hydrolysis with  
6 different cellulase loadings (3.0, 4.5 and 6.0 FPU/g sorghum) at 28 °C.

7 **Figure S2.** Reducing sugar concentration of the cultivation supernatant during the conversion of  
8 wild type (solid square), *bmr6* mutant (solid triangle), *bmr12* mutant (open square) and  
9 *bmr6/bmr12* double mutant (open triangle) sorghum biomass by *C. echinulata* FR3.

10 **Figure S3.** Solid state  $^{13}\text{C}$  CPMAS NMR analysis of control and fungus-treated sorghum  
11 biomass. (A) wild-type sorghum without fungal conversion; (B) sample 1 of wild-type sorghum  
12 after 6 days of fungal conversion by *C. echinulata* FR3; (C) sample 2 of wild-type sorghum after  
13 6 days of fungal conversion by *C. echinulata* FR3; (D) sample 3 of wild-type sorghum after 6  
14 days of fungal conversion by *C. echinulata* FR3; (E) *bmr6/bmr12* double mutant sorghum  
15 without fungal conversion; (F) sample 1 of *bmr6/bmr12* double mutant sorghum after 6 days of  
16 fungal conversion by *C. echinulata* FR3; (G) sample 2 of *bmr6/bmr12* double mutant sorghum  
17 after 6 days of fungal conversion by *C. echinulata* FR3; and (H) sample 3 of *bmr6/bmr12* double  
18 mutant sorghum after 6 days of fungal conversion by *C. echinulata* FR3.

19 **Figure S4.** Comparison of the expanded  $^{13}\text{C}$  CPMAS NMR region of fungus-converted sorghum  
20 by *C. echinulata* FR3 and their corresponding controls. (A) aromatic resonances, (B)  
21 carbohydrate carbon resonances. (black) wild-type sorghum without fungal conversion; (red)  
22 sample 1 of wild-type sorghum after 6 days of fungal conversion by *C. echinulata* FR3; (blue)  
23 sample 2 of wild-type sorghum after 6 days of fungal conversion by *C. echinulata* FR3; (green)  
24 sample 3 of wild-type sorghum after 6 days of fungal conversion by *C. echinulata* FR3;  
25 (magenta) *bmr6/bmr12* double mutant sorghum without fungal conversion; (lite blue) sample 1  
26 of *bmr6/bmr12* double mutant sorghum after 6 days of fungal conversion by *C. echinulata* FR3;  
27 (orange) sample 2 of *bmr6/bmr12* double mutant sorghum after 6 days of fungal conversion by *C.*  
28 *echinulata* FR3; and (olive) sample 3 of *bmr6/bmr12* double mutant sorghum after 6 days of  
29 fungal conversion by *C. echinulata* FR3.

30 **Figure S5.** GC/MS analysis of lipid profile of *C. echinulata* FR3 after growing 6 days on dilute  
31 acid pretreated wild-type sorghum and un-pretreated *bmr6/bmr12* double mutant sorghum  
32 biomass.

33 **Figure S6.** Functional analysis of lignocellulose degradation gene categories based on CAZy  
34 database. (A). Distribution of glycoside hydrolases (GH), glycosyl transferases (GT),  
35 polysaccharide lyases (PL), carbohydrate esterases (CE) and auxiliary activities (AA) among the  
36 CAZy orthologous genes. (B). Distribution of each GH family among the putative glycoside  
37 hydrolases genes.

38 **Figure S7.** Phylogenetic analysis of CeFR1943 laccase-like multiple copper oxidase with the  
39 other 35 published laccases from 30 different species including fungus (ascomycetes and  
40 basidiomycetes) and plants.

41

42

| Genotype                           | Cellulose (%) | Hemicellulose (%) | Lignin (%) | Ash (%) |
|------------------------------------|---------------|-------------------|------------|---------|
| Wild type                          | 24.71         | 19.00             | 17.28      | 4.42    |
| <i>bmr6</i> mutant                 | 25.31         | 19.85             | 16.49      | 5.20    |
| <i>bmr12</i> mutant                | 24.60         | 19.30             | 16.72      | 5.52    |
| <i>bmr6/bmr12</i><br>double mutant | 24.10         | 18.45             | 15.50      | 6.23    |

43

44

Table S1

45

| $\delta_C$ (ppm) | Assignment                                                               |
|------------------|--------------------------------------------------------------------------|
| 198              | Aromatic carbonyl (-CO-) resonances                                      |
| 185-175          | Aliphatic carbonyl/carboxyl (-COOR, -COO-) resonances                    |
| 160-200          | Carbonyl and carboxyl carbon resonances                                  |
| 175-165          | Aromatic carboxyl (-COO-) resonances                                     |
| 155-160          | C4 resonances in <i>p</i> -coumarate ester/ <i>p</i> -hydroxyphenyl unit |
| 100-162          | Aromatic ring resonances (H,G,S)                                         |
| 149-152          | C3,C5 in etherified S- and C3 in etherified G-unit                       |
| 147-149          | C3, C5 in non-etherified S- and C3 in non-etherified G-unit.             |
| 136-140          | C1 resonances in etherified H,G and S-unit                               |
| 132-134          | C1 resonances in non-etherified H,G and S-unit                           |
| 103-130          | C2, C6 in S- /C3,C5 in H- /C5 in G-unit                                  |
| 60-100           | Carbohydrate carbon resonances                                           |
| 52-55            | Methoxyl in S- and G-unit                                                |
| 40-20            | Aliphatic carbon resonances of fatty acids & triglycerides               |

Table S2

46  
47

48

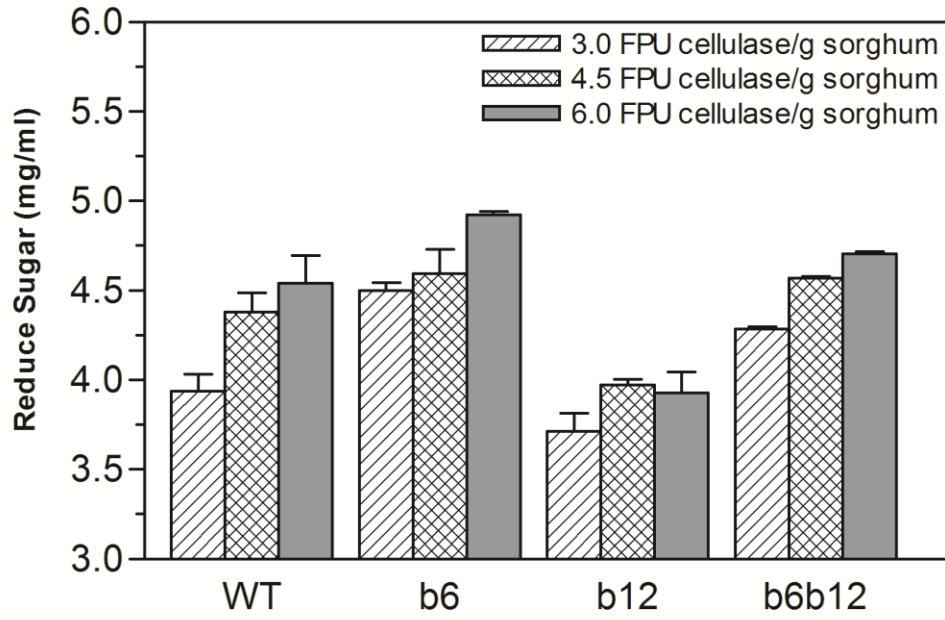

49

50

51

Figure S1

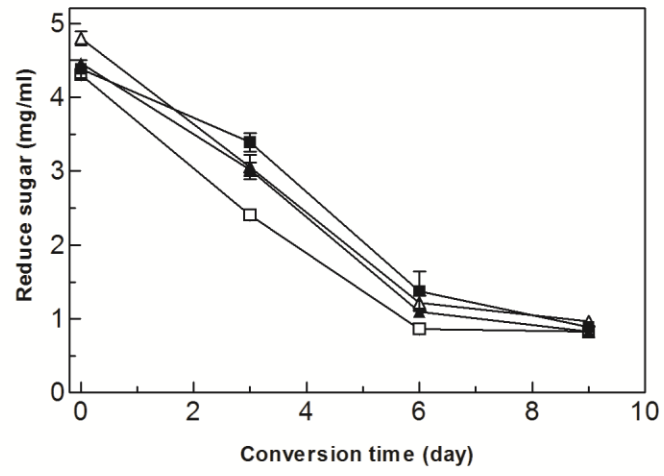

52

53

Figure S2

54

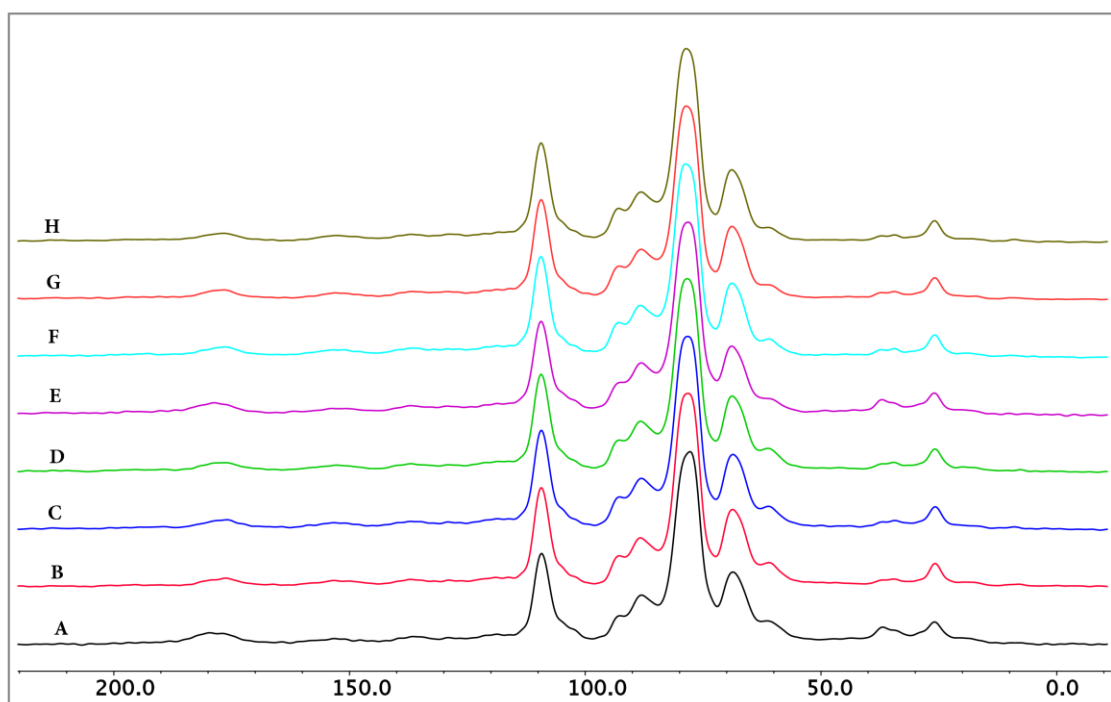

55

56

Figure S3

57

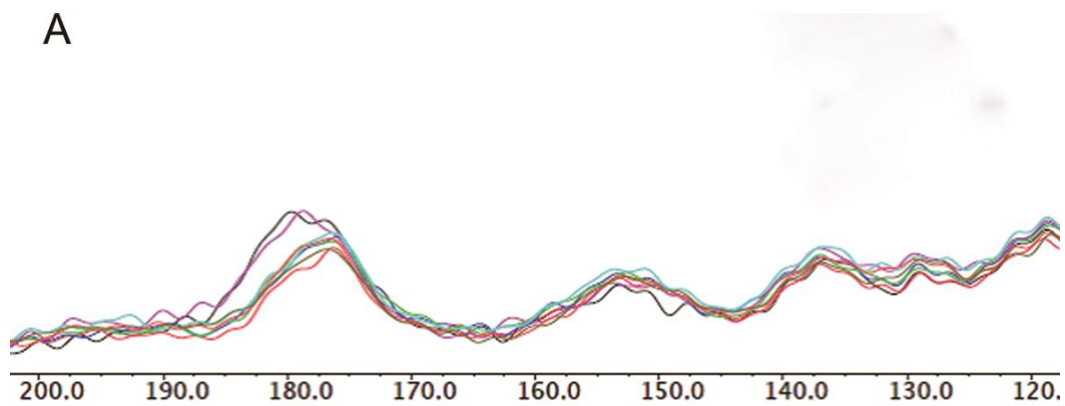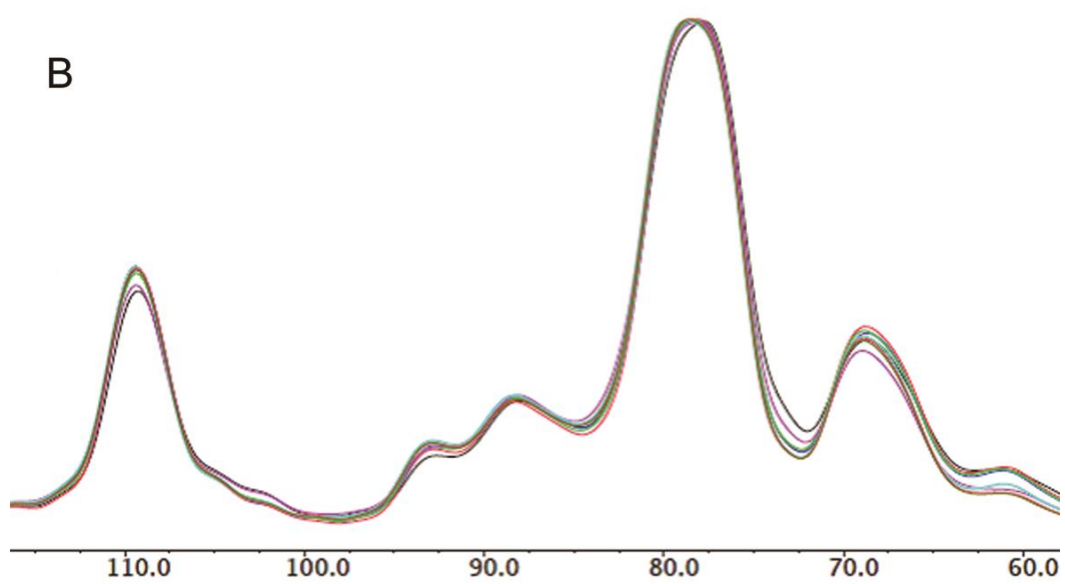

58

59

60

Figure S4



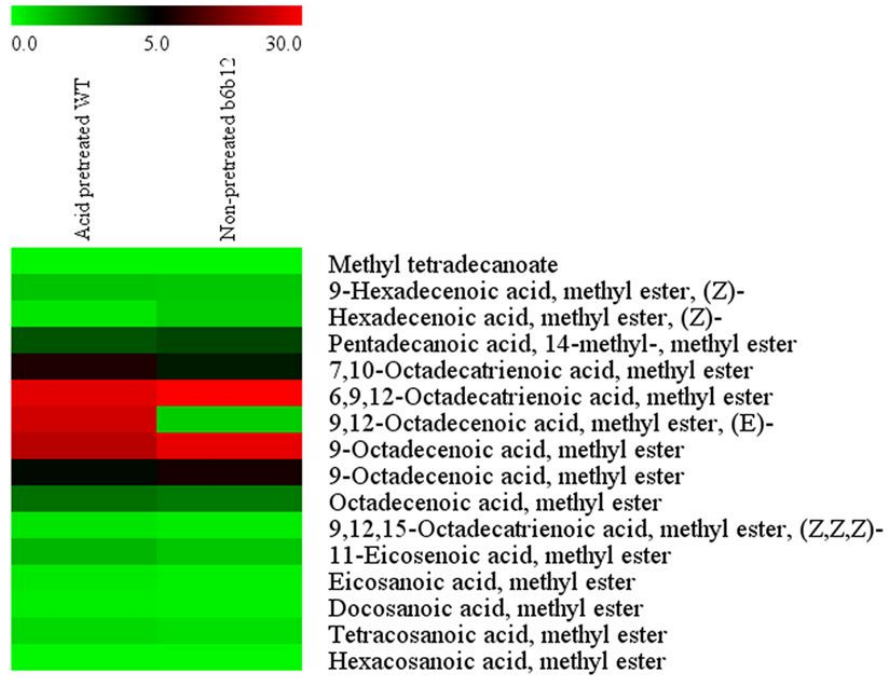

61

62

63

Figure S5



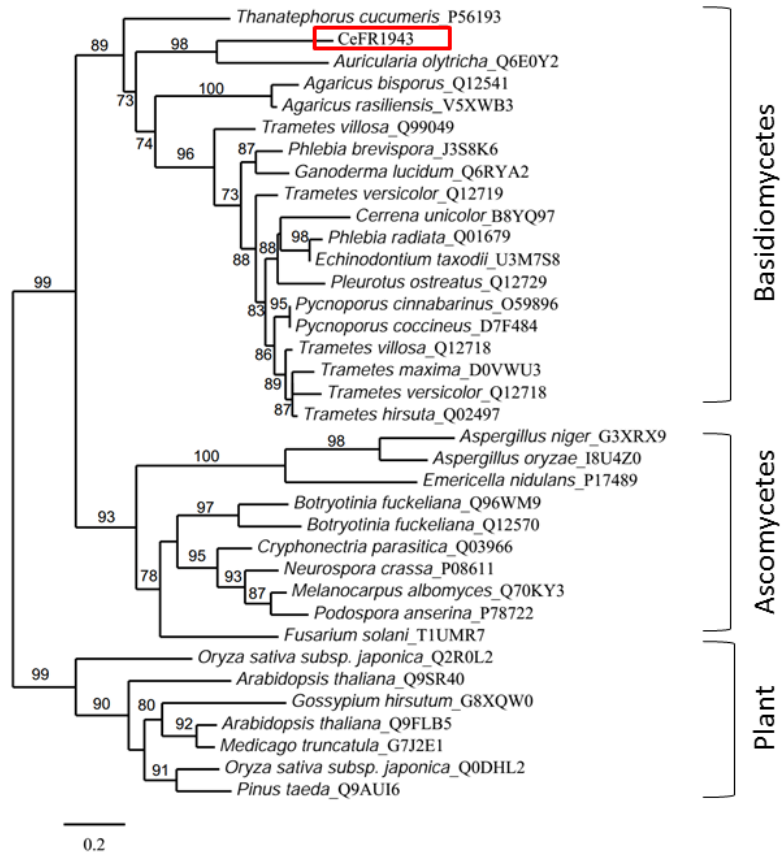

67

68

69

70

Figure S7
